# Supplementary material
Source: ML conference proceedings conference paper supplement (https://openaccess.thecvf.com/content/ICCV2023/html/Chen_AdaMV-MoE_Adaptive_Multi-Task_ICCV_2023_paper.html)
Supplement: Supplementary file 1 [file Chen_AdaMV-MoE_Adaptive_Multi-Task_ICCV_2023_supplemental.pdf]

## A1. More Implementation Details

**More Backbone Details.** For our AdaMV-MoE, the patch sizes are 8 and 16 for classification and object detection & instance segmentation tasks, respectively. We follow [16] to use a constant window scale of 2 on the OD & IS tasks to save computational outlay. The patches are extracted from images in an overlapping way [75] with a size of 2 for all tasks. To extract patches, we prepend convolutional layers before the Transformer’s encoder,

Furthermore, similar to [58], the stochastic depth technique [35] is adopted with a probability of 0.1 during training. In addition, Table A6 summarizes the model configurations of *Large Dense* baselines.

Table A6. Detailed model sizes of (*Large Dense*) ViT variants.

| Backbones  | # Transformer Layers | # Attention Heads | Hidden Dimension | MLP Dimension |
|------------|----------------------|-------------------|------------------|---------------|
| ViT-Small* | 6                    | 6                 | 576              | 2304          |
| ViT-Small  | 12                   | 6                 | 576              | 2304          |
| ViT-Base   | 12                   | 6                 | 900              | 3600          |
| UViT-Base  | 18                   | 6                 | 576              | 2304          |

## A2. More Experiment Results

**Extra Studies of AES.** More comparisons between using a fixed number of activated experts and our AES are conducted with the ViT-Small\* backbone. The multi-task vision recognition performance is collected in Table A7. We see that AES yields overall better results since it customizes network capacity for different tasks in MTL.

Table A7. Multi-task vision recognition performance of ViT-Small\* with a different number of selected experts or our proposed Adaptive Expert Selection (AES).

| # Experts Activated | Classification | Object Detection | Instance Segmentation  |
|---------------------|----------------|------------------|------------------------|
|                     | Accuracy(%)    | AP(%)            | AP <sup>mask</sup> (%) |
| $k = 2$             | 72.04          | 38.61            | 35.23                  |
| $k = 3$             | 72.66          | 39.03            | 35.68                  |
| $k = 4$             | 72.90          | 38.98            | 35.74                  |
| AES                 | <b>72.99</b>   | <b>39.04</b>     | <b>35.76</b>           |

**Extra Studies on Training Iterations.** We vary the number of training iterations for AdaMV-MoE and MTL-ViT, and report the performance in Table A8. We see that AdaMV-MoE enjoys a better convergence.

**More Specialization Results.** Similar to Figure 4, we provide the class-wise expert usage for object detection and instance segmentation tasks in Figure A8. We see the expert 4 is most frequently used, while other experts’ activation is more correlated with class types.

Table A8. Multi-task vision recognition performance of ViT-Small\* trained with a different number of iterations.

| # Iterations | Methods   | Classification | Object Detection | Instance Segmentation  |
|--------------|-----------|----------------|------------------|------------------------|
|              |           | Accuracy(%)    | AP(%)            | AP <sup>mask</sup> (%) |
| 100K         | MTL-ViT   | 54.61          | 35.17            | 33.18                  |
|              | AdaMV-MoE | 58.84          | 36.65            | 34.13                  |
| 300K         | MTL-ViT   | 68.36          | 36.46            | 34.25                  |
|              | AdaMV-MoE | 69.71          | 37.50            | 34.93                  |
| 500K         | MTL-ViT   | 68.71          | 36.98            | 34.60                  |
|              | AdaMV-MoE | 72.99          | 39.04            | 35.76                  |

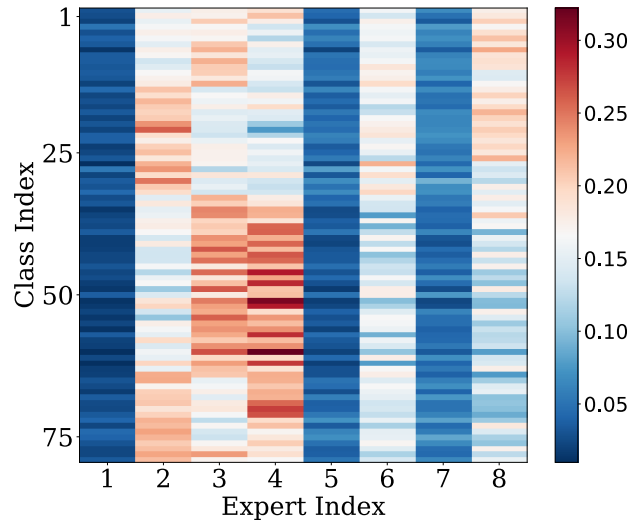

Figure A8. Analysis on the class-level routing specialization of OD & IS, produced by AdaMV-MoE with ViT-Small\*.
